# Supplementary material for: The role of Se content in improving anti-tumor activities and its potential mechanism for selenized Artemisia sphaerocephala polysaccharides
Source: Royal Society of Chemistry journal article supplement (doi:10.1039/d0fo03013a), 2021-01-01
Supplement: d0fo03013a1.pdf [file d0fo03013a1.pdf]

Supporting file

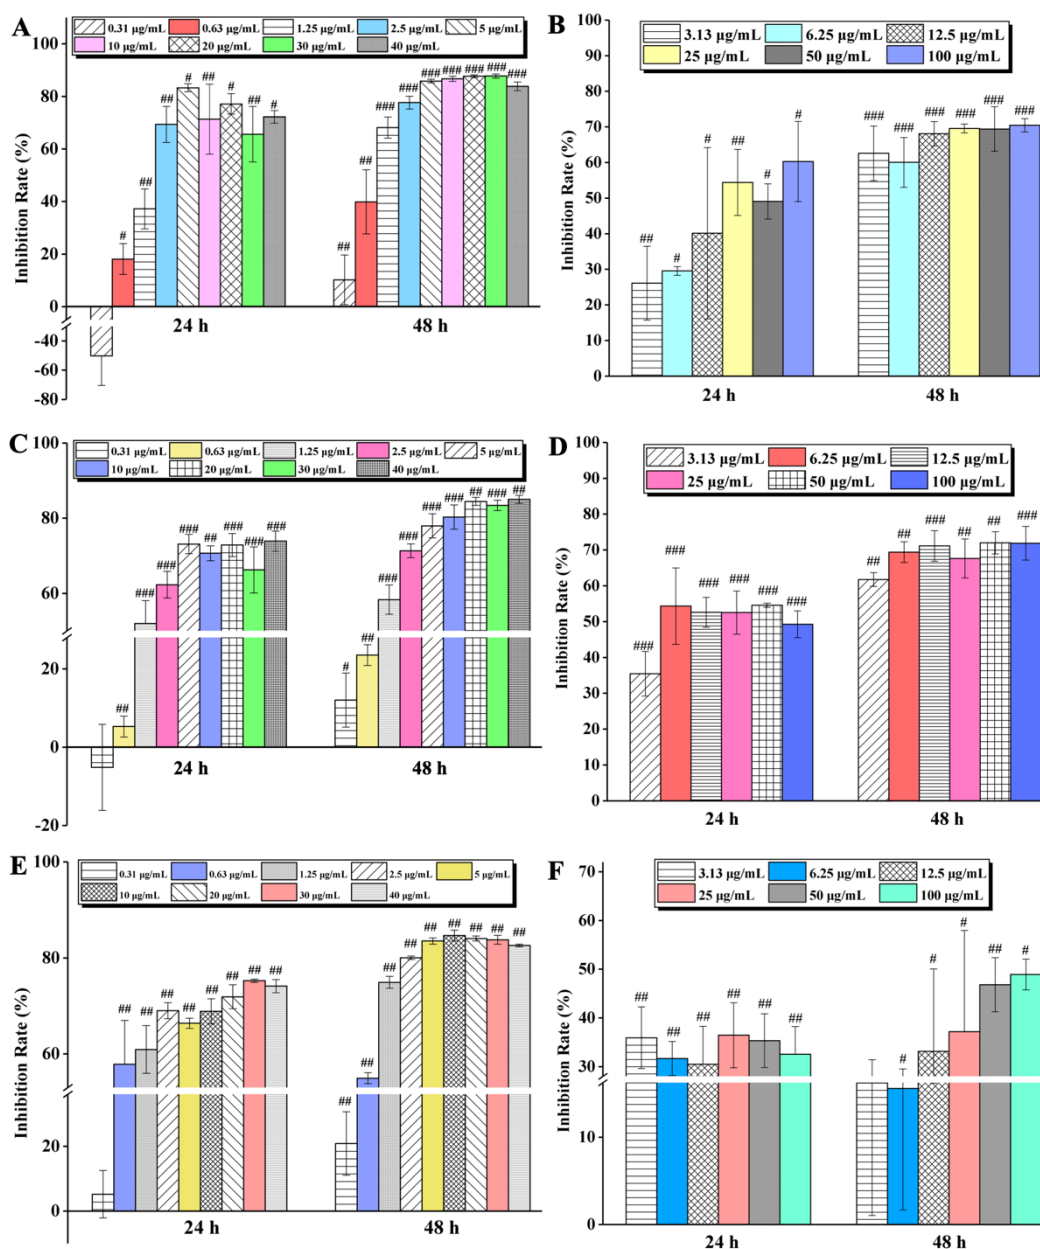

**Fig. S1** Inhibition rates of  $\text{Na}_2\text{SeO}_3$  and 5-FU against A549 cells (A-B), HepG2 cells (C-D), and H1975 cells (E-F) after 24 and 48 h treatment *in vitro*. The inhibition rates were presented as mean values ( $n = 3$ ). # $p < 0.05$  compared with the control.

**Table S1** Correlation coefficients ( $R^2$ ) between Se equivalent and inhibition rates of SeASPs  
against three tumor cells *in vitro*.

| Samples            | Se content<br>( $\mu\text{g/g}$ ) | A549 cell ( $\mu\text{g/mL}$ ) |        | HepG2 cell ( $\mu\text{g/mL}$ ) |                | H1975 cell ( $\mu\text{g/mL}$ ) |        |
|--------------------|-----------------------------------|--------------------------------|--------|---------------------------------|----------------|---------------------------------|--------|
|                    |                                   | 24h                            | 48h    | 24h                             | 48h            | 24h                             | 48h    |
| SeASP <sub>1</sub> | 4702                              | 0.8604                         | 0.6576 | 0.5337                          | - <sup>a</sup> | -                               | 0.4666 |
| SeASP <sub>2</sub> | 9705                              | 0.0793                         | 0.0005 | -                               | -              | 0.8944                          | 0.8398 |
| SeASP <sub>3</sub> | 13030                             | -                              | -      | -                               | -              | 0.6973                          | -      |
| SeASP <sub>4</sub> | 4344                              | 0.7564                         | 0.2507 | 0.8501                          | 0.9857         | -                               | 0.8770 |
| SeASP <sub>5</sub> | 4575                              | 0.4433                         | 0.7987 | -                               | 0.4889         | -                               | -      |
| SeASP <sub>6</sub> | 7089                              | 0.7020                         | 0.0479 | 0.6396                          | 0.6069         | -                               | -      |

<sup>a</sup> Not detected.

**Table S2** Cell cycle arrest effects of Na<sub>2</sub>SeO<sub>3</sub>, 5-FU, ASP, and SeASPs against A549 cells.

| Group                              | 24 h         |              |              | 48 h         |              |              |
|------------------------------------|--------------|--------------|--------------|--------------|--------------|--------------|
|                                    | G0/G1 (%)    | S (%)        | G2/M (%)     | G0/G1 (%)    | S (%)        | G2/M (%)     |
| Control                            | 39.32 ± 0.75 | 55.52 ± 0.74 | 5.16 ± 0.05  | 37.13 ± 0.92 | 49.01 ± 0.95 | 13.87 ± 0.88 |
| L-ASP                              | 42.02 ± 1.27 | 53.13 ± 0.97 | 4.56 ± 0.31  | 38.59 ± 1.18 | 46.93 ± 0.66 | 14.48 ± 0.81 |
| M-ASP                              | 43.48 ± 1.61 | 49.83 ± 1.15 | 6.36 ± 0.54  | 36.19 ± 0.76 | 53.19 ± 0.53 | 10.29 ± 0.53 |
| H-ASP                              | 38.48 ± 1.44 | 54.88 ± 1.33 | 6.67 ± 0.58  | 39.17 ± 5.57 | 50.08 ± 6.77 | 10.74 ± 1.28 |
| L-5-FU                             | 66.40 ± 0.00 | 33.26 ± 1.77 | 0.00 ± 0.00  | 74.99 ± 1.82 | 25.01 ± 1.82 | 0.00 ± 0.00  |
| M-5-FU                             | 70.68 ± 2.64 | 29.31 ± 2.64 | 0.00 ± 0.00  | 64.14 ± 1.21 | 35.90 ± 1.14 | 0.00 ± 0.00  |
| H-5-FU                             | 66.90 ± 0.32 | 33.10 ± 0.32 | 0.00 ± 0.00  | 64.87 ± 1.69 | 35.13 ± 1.69 | 0.00 ± 0.00  |
| L-Na <sub>2</sub> SeO <sub>3</sub> | 54.28 ± 7.14 | 39.81 ± 7.94 | 6.58 ± 1.24  | 41.48 ± 0.80 | 46.57 ± 1.39 | 11.98 ± 1.07 |
| M-Na <sub>2</sub> SeO <sub>3</sub> | 46.06 ± 1.34 | 44.19 ± 1.53 | 9.42 ± 0.42  | 39.56 ± 1.63 | 52.99 ± 3.01 | 7.45 ± 1.46  |
| H-Na <sub>2</sub> SeO <sub>3</sub> | 48.80 ± 0.33 | 44.56 ± 1.37 | 6.64 ± 1.40  | 44.02 ± 1.38 | 45.26 ± 1.54 | 10.73 ± 0.67 |
| L-SeASP <sub>3</sub>               | 51.67 ± 1.63 | 36.28 ± 1.01 | 12.06 ± 0.62 | 42.91 ± 0.82 | 39.44 ± 0.82 | 17.65 ± 0.02 |
| M-SeASP <sub>3</sub>               | 44.52 ± 0.78 | 43.10 ± 0.43 | 12.65 ± 0.80 | 41.18 ± 0.41 | 37.07 ± 1.02 | 21.75 ± 0.64 |
| H-SeASP <sub>3</sub>               | 39.01 ± 0.95 | 50.71 ± 0.46 | 10.28 ± 0.57 | 37.35 ± 0.76 | 42.86 ± 1.56 | 19.80 ± 0.80 |
| L-SeASP <sub>6</sub>               | 30.28 ± 0.77 | 49.30 ± 0.94 | 20.42 ± 0.28 | 30.11 ± 0.23 | 49.61 ± 0.46 | 20.28 ± 0.25 |
| M-SeASP <sub>6</sub>               | 27.13 ± 0.78 | 51.00 ± 0.95 | 21.87 ± 0.62 | 30.50 ± 0.42 | 49.84 ± 0.70 | 19.66 ± 0.30 |
| H-SeASP <sub>6</sub>               | 28.83 ± 0.40 | 50.87 ± 0.24 | 20.30 ± 0.20 | 29.21 ± 0.71 | 52.51 ± 0.69 | 19.28 ± 0.23 |

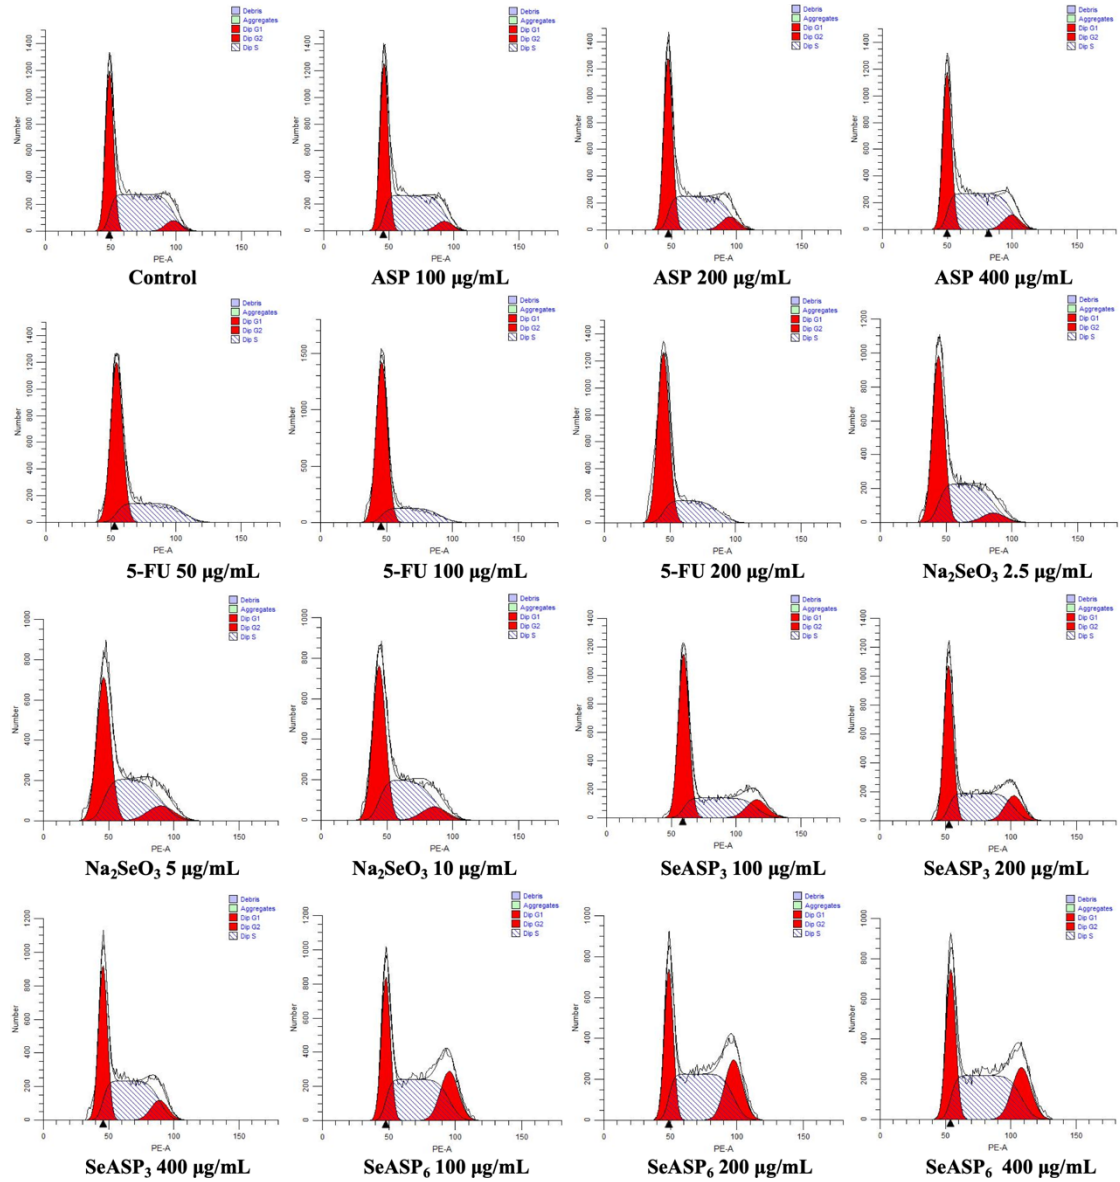

**Fig. S2** Cell cycle arrest of A549 cells treated with  $\text{Na}_2\text{SeO}_3$ , 5-FU, ASP, and SeASPs for 24 h.

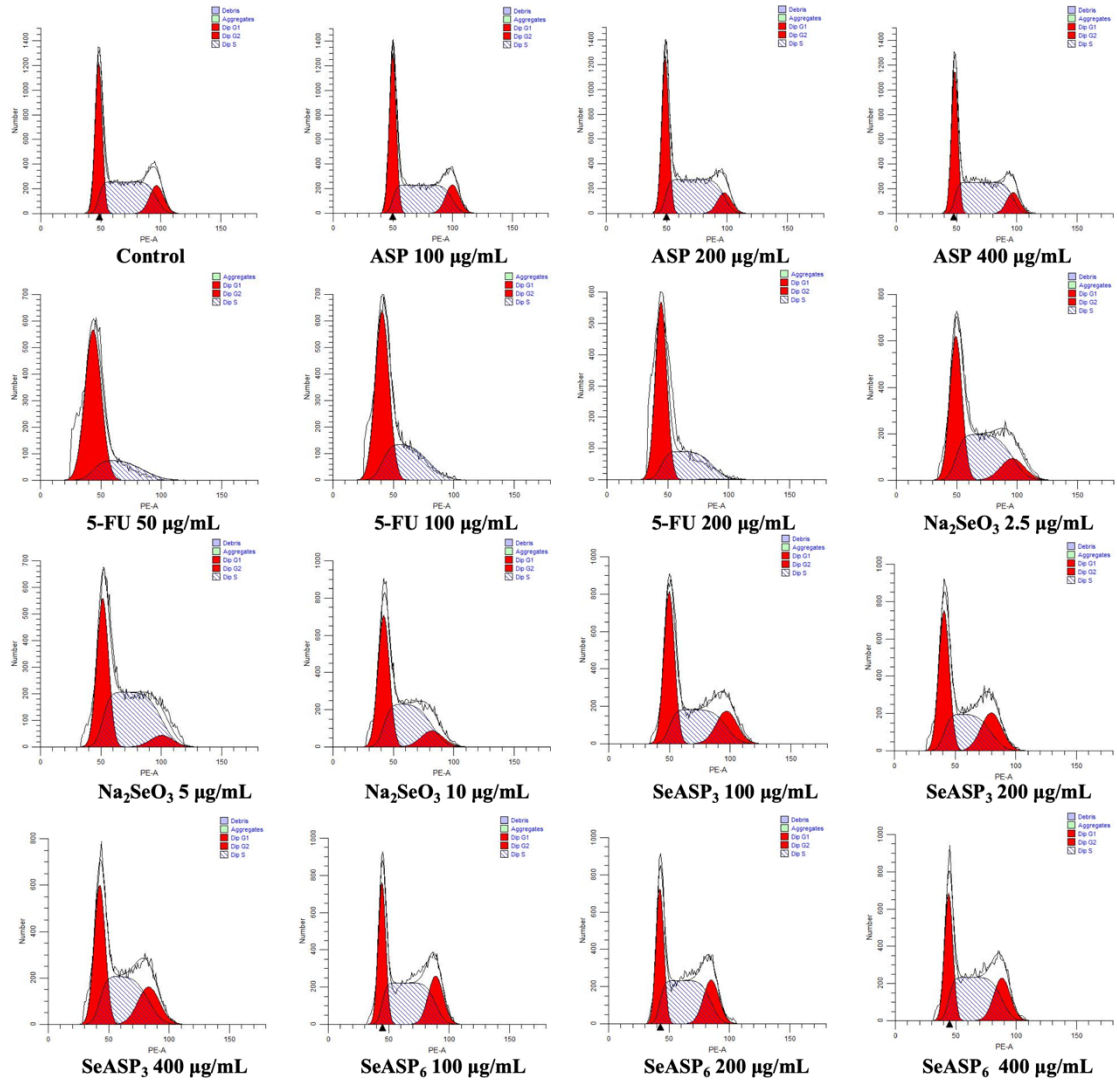

**Fig. S3** Cell cycle arrest of A549 cells treated with Na<sub>2</sub>SeO<sub>3</sub>, 5-FU, ASP, and SeASPs for 48 h.

**Table S3** Cell cycle arrest effects of Na<sub>2</sub>SeO<sub>3</sub>, 5-FU, ASP, and SeASPs against HepG2 cells.

| Group                              | 24 h         |              |              | 48 h         |              |              |
|------------------------------------|--------------|--------------|--------------|--------------|--------------|--------------|
|                                    | G0/G1 (%)    | S (%)        | G2/M (%)     | G0/G1 (%)    | S (%)        | G2/M (%)     |
| Control                            | 62.38 ± 0.74 | 28.87 ± 0.99 | 10.75 ± 0.33 | 71.46 ± 0.81 | 22.02 ± 0.41 | 6.51 ± 0.41  |
| L-ASP                              | 65.39 ± 0.40 | 24.50 ± 0.34 | 10.12 ± 0.08 | 71.24 ± 0.46 | 21.25 ± 0.29 | 7.51 ± 0.28  |
| M-ASP                              | 55.44 ± 1.33 | 32.40 ± 0.77 | 12.16 ± 0.58 | 71.58 ± 0.12 | 23.59 ± 0.08 | 4.83 ± 0.17  |
| H-ASP                              | 60.83 ± 0.36 | 26.66 ± 0.35 | 12.51 ± 0.44 | 66.12 ± 0.49 | 27.31 ± 0.81 | 6.57 ± 0.42  |
| L-5-FU                             | 67.02 ± 0.18 | 31.61 ± 0.38 | 1.37 ± 0.36  | 76.33 ± 0.35 | 23.23 ± 0.32 | 0.44 ± 0.40  |
| M-5-FU                             | 67.17 ± 0.25 | 30.26 ± 0.49 | 2.57 ± 0.25  | 76.11 ± 0.25 | 22.94 ± 0.32 | 1.07 ± 0.11  |
| H-5-FU                             | 67.04 ± 0.48 | 29.63 ± 0.53 | 3.33 ± 0.05  | 75.91 ± 0.19 | 23.14 ± 0.24 | 0.96 ± 0.09  |
| L-Na <sub>2</sub> SeO <sub>3</sub> | 40.64 ± 0.53 | 42.22 ± 0.63 | 17.15 ± 0.27 | 48.54 ± 0.63 | 33.30 ± 0.50 | 18.16 ± 0.48 |
| M-Na <sub>2</sub> SeO <sub>3</sub> | 44.81 ± 0.84 | 37.94 ± 0.65 | 17.24 ± 0.21 | 48.18 ± 0.50 | 31.10 ± 0.24 | 20.72 ± 0.30 |
| H-Na <sub>2</sub> SeO <sub>3</sub> | 46.12 ± 0.58 | 40.64 ± 0.87 | 13.24 ± 0.30 | 49.28 ± 0.77 | 31.31 ± 0.59 | 19.41 ± 0.82 |
| L-SeASP <sub>3</sub>               | 63.51 ± 0.44 | 23.11 ± 0.91 | 13.37 ± 0.48 | 61.69 ± 0.69 | 25.54 ± 0.95 | 12.78 ± 0.73 |
| M-SeASP <sub>3</sub>               | 64.76 ± 0.44 | 22.12 ± 0.31 | 13.12 ± 0.13 | 69.42 ± 2.46 | 21.80 ± 1.06 | 8.78 ± 1.81  |
| H-SeASP <sub>3</sub>               | 67.59 ± 0.31 | 18.85 ± 0.14 | 13.56 ± 0.27 | 69.67 ± 0.63 | 18.26 ± 2.05 | 12.07 ± 1.41 |
| L-SeASP <sub>6</sub>               | 28.68 ± 0.44 | 60.94 ± 0.38 | 10.38 ± 0.14 | 21.61 ± 0.21 | 65.62 ± 0.21 | 12.87 ± 0.44 |
| M-SeASP <sub>6</sub>               | 31.82 ± 0.21 | 57.13 ± 0.36 | 11.05 ± 0.46 | 25.88 ± 0.10 | 65.14 ± 0.49 | 8.98 ± 0.42  |
| H-SeASP <sub>6</sub>               | 36.82 ± 0.25 | 51.22 ± 0.12 | 11.91 ± 0.17 | 44.42 ± 1.40 | 47.92 ± 1.19 | 7.66 ± 1.19  |

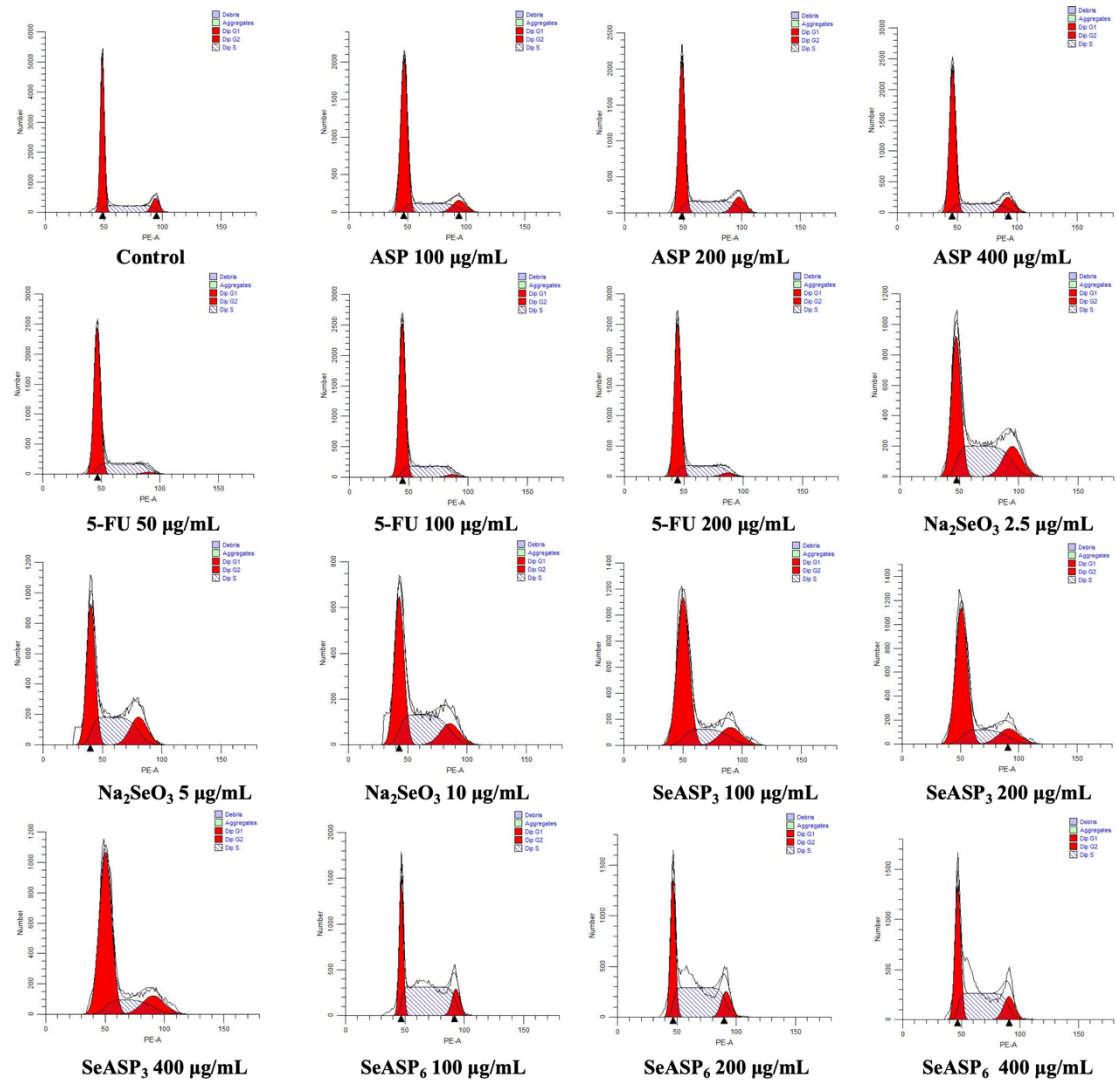

**Fig. S4** Cell cycle arrest of HepG2 cells treated with Na<sub>2</sub>SeO<sub>3</sub>, 5-FU, ASP, and SeASPs for 24 h.

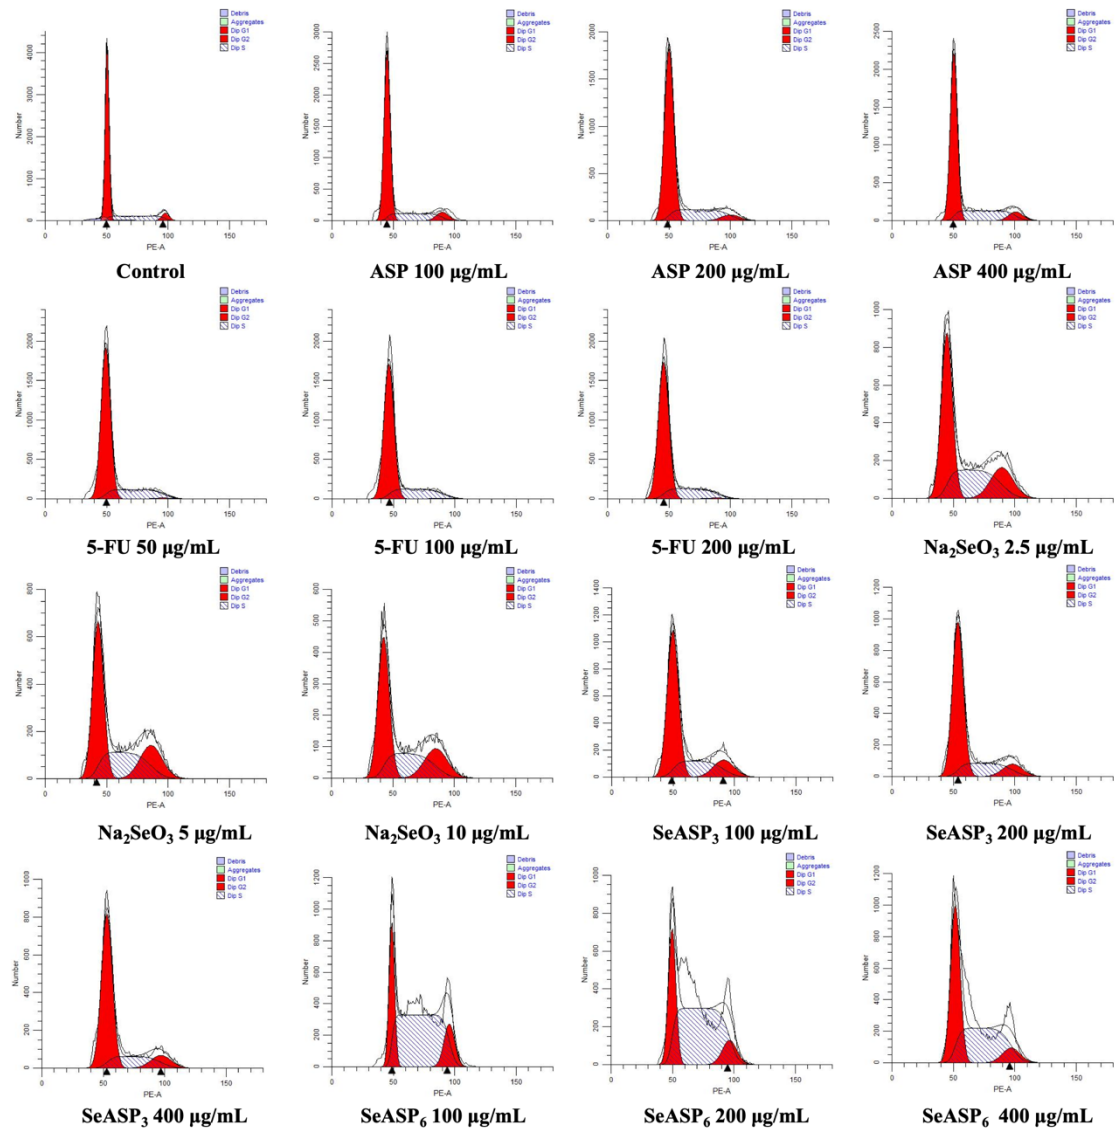

**Fig. S5** Cell cycle arrest of HepG2 cells treated with Na<sub>2</sub>SeO<sub>3</sub>, 5-FU, ASP, and SeASPs for 48 h.



**Table S4** Cell cycle arrest effects of Na<sub>2</sub>SeO<sub>3</sub>, 5-FU, ASP, and SeASPs against H1975 cells.

| Group                              | 24 h         |              |              | 48 h         |              |              |
|------------------------------------|--------------|--------------|--------------|--------------|--------------|--------------|
|                                    | G0/G1 (%)    | S (%)        | G2/M (%)     | G0/G1 (%)    | S (%)        | G2/M (%)     |
| Control                            | 56.12 ± 1.11 | 38.55 ± 0.77 | 4.65 ± 0.50  | 58.17 ± 1.42 | 39.34 ± 1.82 | 2.49 ± 0.61  |
| L-ASP                              | 59.30 ± 0.59 | 34.28 ± 0.47 | 6.42 ± 0.17  | 56.69 ± 0.59 | 40.62 ± 0.15 | 3.22 ± 0.49  |
| M-ASP                              | 63.96 ± 1.05 | 26.68 ± 0.12 | 9.43 ± 1.08  | 66.72 ± 0.83 | 27.93 ± 0.71 | 5.36 ± 0.43  |
| H-ASP                              | 66.97 ± 1.07 | 26.15 ± 1.04 | 6.90 ± 0.10  | 62.02 ± 1.13 | 26.83 ± 1.24 | 11.15 ± 0.39 |
| L-5-FU                             | 82.88 ± 0.97 | 17.12 ± 0.72 | 0.00 ± 0.00  | 79.83 ± 0.36 | 20.17 ± 0.36 | 0.00 ± 0.00  |
| M-5-FU                             | 83.12 ± 0.60 | 16.88 ± 0.60 | 0.00 ± 0.00  | 80.46 ± 0.26 | 19.54 ± 0.26 | 0.00 ± 0.00  |
| H-5-FU                             | 83.44 ± 1.30 | 16.56 ± 1.30 | 0.00 ± 0.00  | 77.07 ± 0.45 | 22.93 ± 0.45 | 0.00 ± 0.00  |
| L-Na <sub>2</sub> SeO <sub>3</sub> | 41.91 ± 0.10 | 46.90 ± 0.61 | 11.19 ± 0.51 | 47.10 ± 2.55 | 41.59 ± 3.15 | 11.31 ± 0.71 |
| M-Na <sub>2</sub> SeO <sub>3</sub> | 42.26 ± 0.72 | 49.16 ± 0.05 | 8.58 ± 0.76  | 57.58 ± 3.92 | 40.75 ± 4.79 | 11.68 ± 0.94 |
| H-Na <sub>2</sub> SeO <sub>3</sub> | 44.22 ± 0.64 | 48.20 ± 0.76 | 7.62 ± 0.37  | 49.62 ± 3.50 | 45.38 ± 9.24 | 5.04 ± 5.79  |
| L-SeASP <sub>3</sub>               | 20.05 ± 0.95 | 62.19 ± 0.77 | 17.76 ± 1.24 | 34.32 ± 4.68 | 58.98 ± 7.10 | 6.70 ± 2.43  |
| M-SeASP <sub>3</sub>               | 21.57 ± 0.19 | 59.93 ± 0.84 | 18.50 ± 0.65 | 41.03 ± 0.22 | 55.05 ± 0.45 | 3.92 ± 0.66  |
| H-SeASP <sub>3</sub>               | 45.49 ± 0.30 | 46.42 ± 0.45 | 8.10 ± 0.37  | 44.58 ± 1.86 | 55.08 ± 2.18 | 0.01 ± 1.41  |
| L-SeASP <sub>6</sub>               | 10.14 ± 1.54 | 76.08 ± 3.42 | 13.78 ± 4.92 | 26.92 ± 0.87 | 57.85 ± 2.73 | 15.23 ± 2.84 |
| M-SeASP <sub>6</sub>               | 7.21 ± 0.99  | 86.98 ± 0.47 | 5.81 ± 1.45  | 34.44 ± 1.88 | 43.11 ± 3.13 | 22.44 ± 1.41 |
| H-SeASP <sub>6</sub>               | 7.77 ± 0.95  | 92.23 ± 0.95 | 0.00 ± 0.00  | 37.27 ± 0.83 | 45.80 ± 1.81 | 16.93 ± 0.99 |

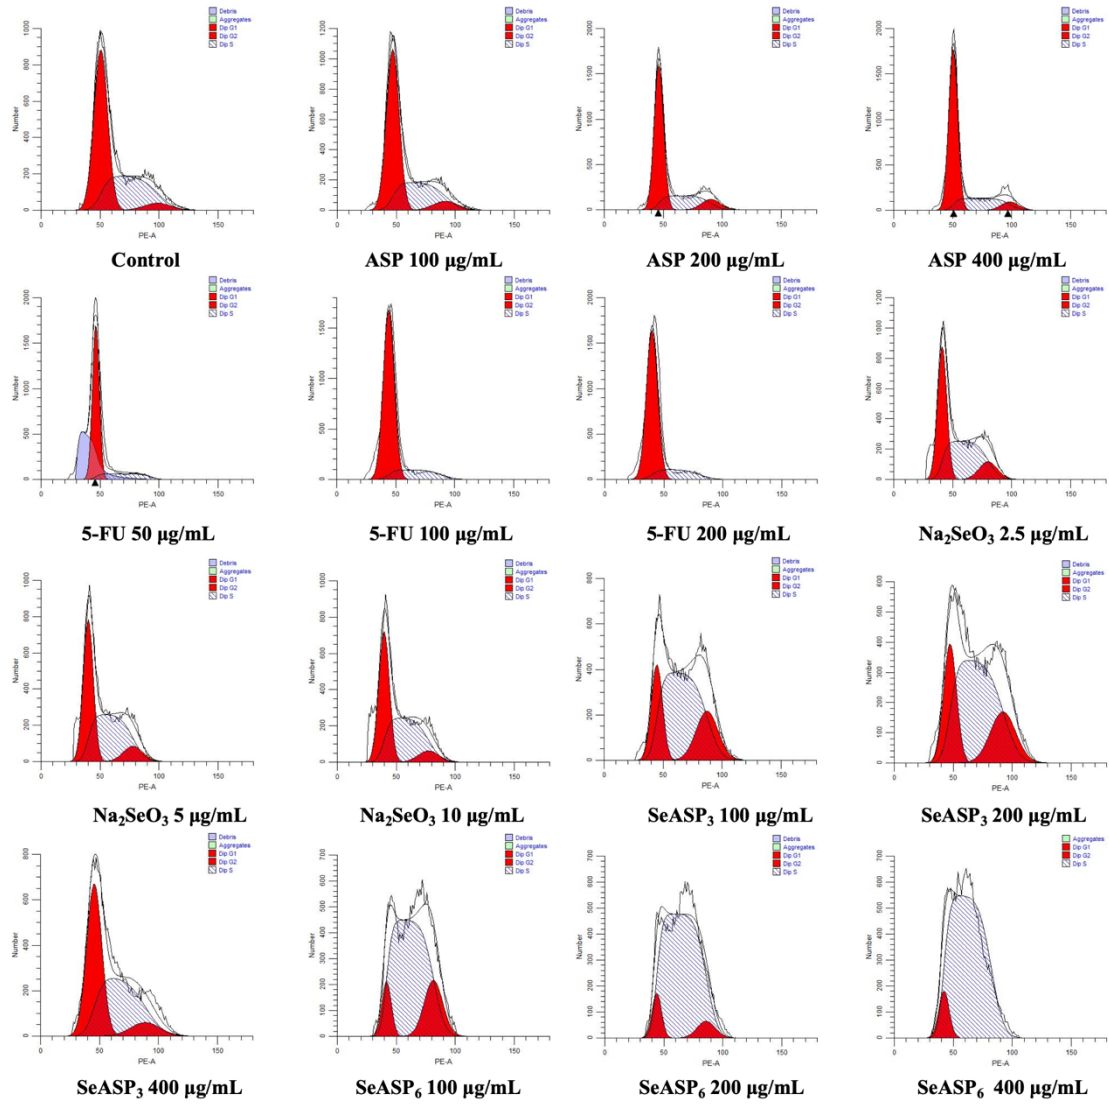

**Fig. S6** Cell cycle arrest of H1975 cells treated with  $\text{Na}_2\text{SeO}_3$ , 5-FU, ASP, and SeASPs for 24 h.

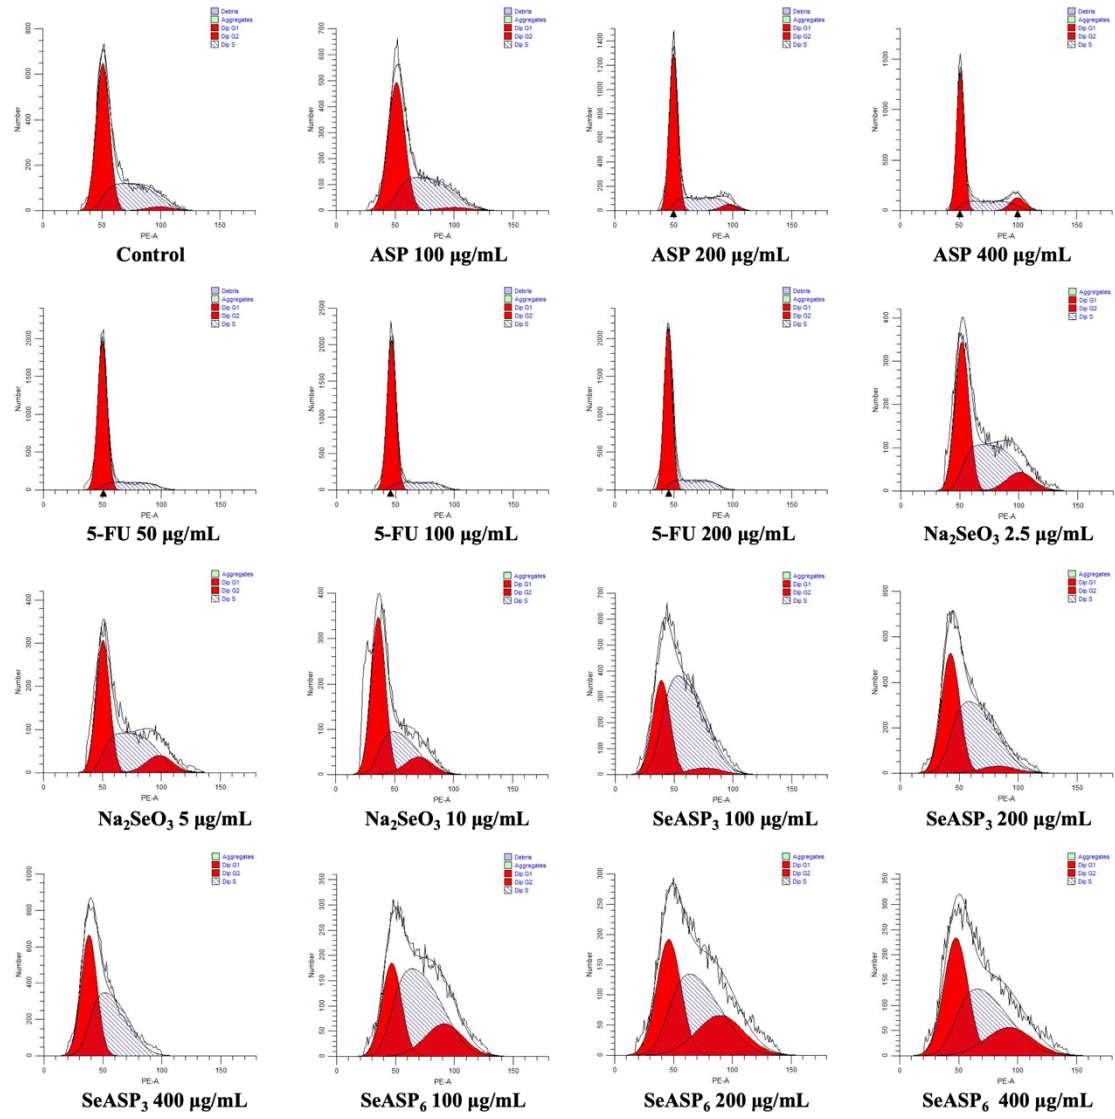

**Fig. S7** Cell cycle arrest of H1975 cells treated with Na<sub>2</sub>SeO<sub>3</sub>, 5-FU, ASP, and SeASPs for 48 h.

**Table S5** Pro-apoptosis effects of Na<sub>2</sub>SeO<sub>3</sub>, 5-FU, ASP, and SeASPs against A549 cells, HepG2 cells, and H1975 cells.

| Group                              | A549 cells (%) |              | HepG2 cells (%) |              | H1975 cells (%) |              |
|------------------------------------|----------------|--------------|-----------------|--------------|-----------------|--------------|
|                                    | 24 h           | 48 h         | 24 h            | 48 h         | 24 h            | 48 h         |
| Control                            | 6.86 ± 0.94    | 6.57 ± 0.75  | 2.49 ± 0.03     | 3.52 ± 0.06  | 12.68 ± 0.66    | 7.57 ± 0.35  |
| L-ASP                              | 6.91 ± 1.73    | 3.97 ± 0.14  | 6.73 ± 0.48     | 7.79 ± 0.57  | 8.88 ± 0.59     | 10.02 ± 0.13 |
| M-ASP                              | 5.93 ± 0.32    | 4.66 ± 0.69  | 5.80 ± 0.28     | 7.04 ± 0.40  | 10.41 ± 1.20    | 7.87 ± 0.25  |
| H-ASP                              | 7.18 ± 1.80    | 4.65 ± 0.65  | 5.89 ± 0.32     | 7.07 ± 0.35  | 6.71 ± 0.38     | 7.15 ± 0.29  |
| L-5-FU                             | 7.30 ± 0.83    | 12.90 ± 0.70 | 10.74 ± 1.17    | 17.33 ± 0.62 | 25.23 ± 0.68    | 19.86 ± 1.13 |
| M-5-FU                             | 8.39 ± 0.14    | 28.33 ± 0.69 | 11.70 ± 1.89    | 13.84 ± 0.48 | 30.16 ± 0.19    | 28.52 ± 0.38 |
| H-5-FU                             | 9.24 ± 0.21    | 25.67 ± 1.69 | 10.88 ± 0.44    | 16.17 ± 0.34 | 18.99 ± 0.33    | 38.23 ± 1.39 |
| L-Na <sub>2</sub> SeO <sub>3</sub> | 21.03 ± 0.24   | 19.32 ± 0.65 | 54.82 ± 0.96    | 42.04 ± 0.40 | 91.23 ± 0.19    | 89.35 ± 0.26 |
| M-Na <sub>2</sub> SeO <sub>3</sub> | 39.16 ± 0.25   | 19.75 ± 0.72 | 63.14 ± 0.30    | 51.09 ± 0.47 | 90.47 ± 0.19    | 96.98 ± 0.14 |
| H-Na <sub>2</sub> SeO <sub>3</sub> | 23.14 ± 0.72   | 18.12 ± 0.65 | 63.08 ± 0.47    | 54.38 ± 0.14 | 91.47 ± 0.20    | 96.94 ± 0.12 |
| L-SeASP <sub>3</sub>               | 9.84 ± 0.91    | 16.64 ± 0.16 | 18.66 ± 0.96    | 37.77 ± 2.55 | 49.90 ± 0.46    | 74.52 ± 0.58 |
| M-SeASP <sub>3</sub>               | 15.20 ± 1.26   | 16.67 ± 1.12 | 20.25 ± 0.39    | 43.03 ± 0.84 | 50.49 ± 1.15    | 73.73 ± 0.28 |
| H-SeASP <sub>3</sub>               | 16.81 ± 1.19   | 24.20 ± 1.20 | 25.22 ± 0.35    | 35.09 ± 0.65 | 53.82 ± 1.36    | 86.43 ± 0.47 |
| L-SeASP <sub>6</sub>               | 12.12 ± 2.55   | 13.80 ± 0.41 | 5.31 ± 2.06     | 13.88 ± 1.58 | 23.42 ± 0.43    | 87.87 ± 0.27 |
| M-SeASP <sub>6</sub>               | 13.57 ± 0.19   | 14.32 ± 0.23 | 7.71 ± 0.54     | 14.68 ± 1.91 | 41.30 ± 0.81    | 75.80 ± 0.41 |
| H-SeASP <sub>6</sub>               | 11.11 ± 0.21   | 14.65 ± 0.94 | 7.53 ± 0.23     | 15.79 ± 0.51 | 38.60 ± 0.79    | 87.76 ± 0.23 |

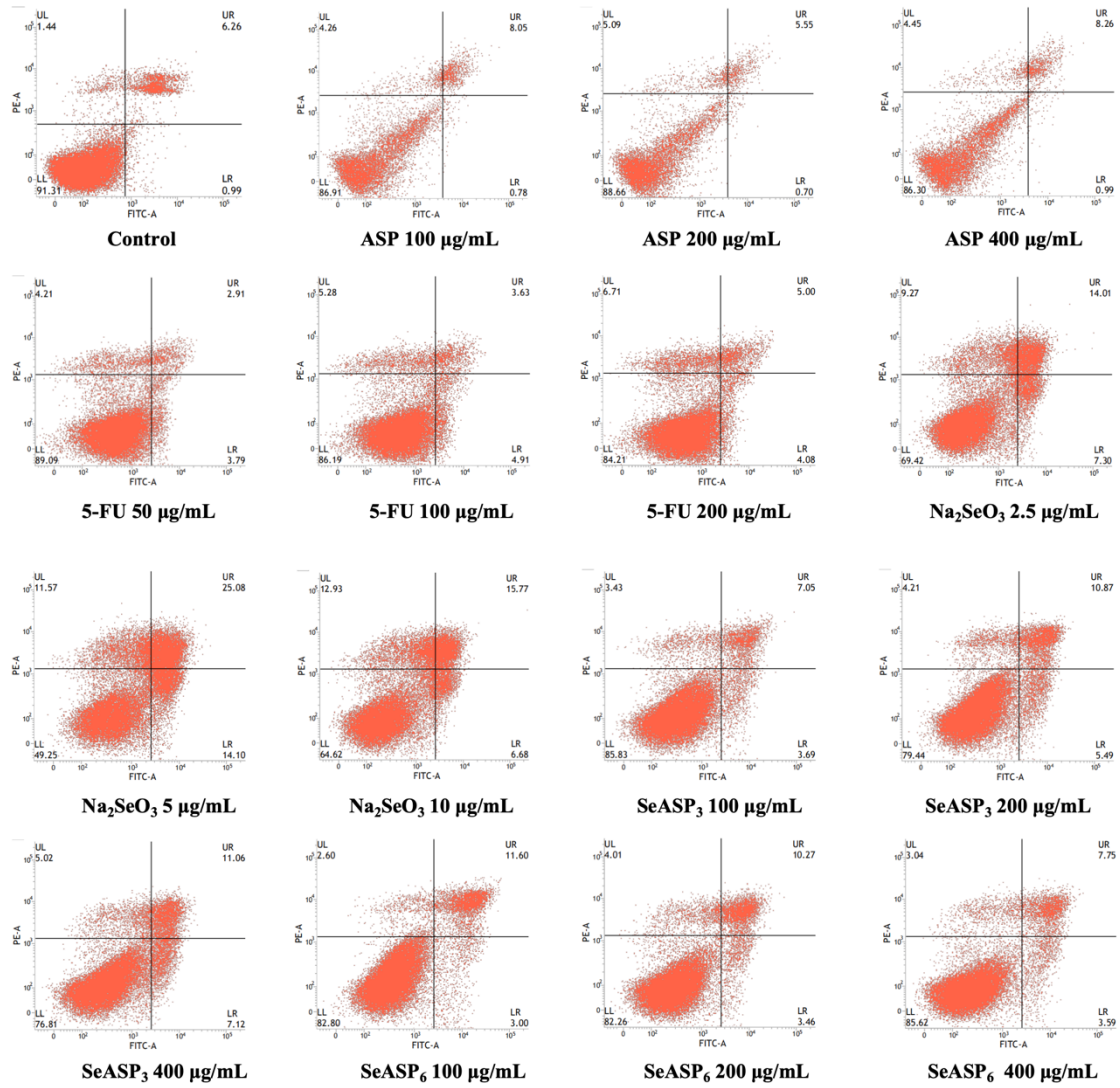

**Fig. S8** Pro-apoptosis effects of Na<sub>2</sub>SeO<sub>3</sub>, 5-FU, ASP, and SeASPs against A549 cells after 24 h treatment.

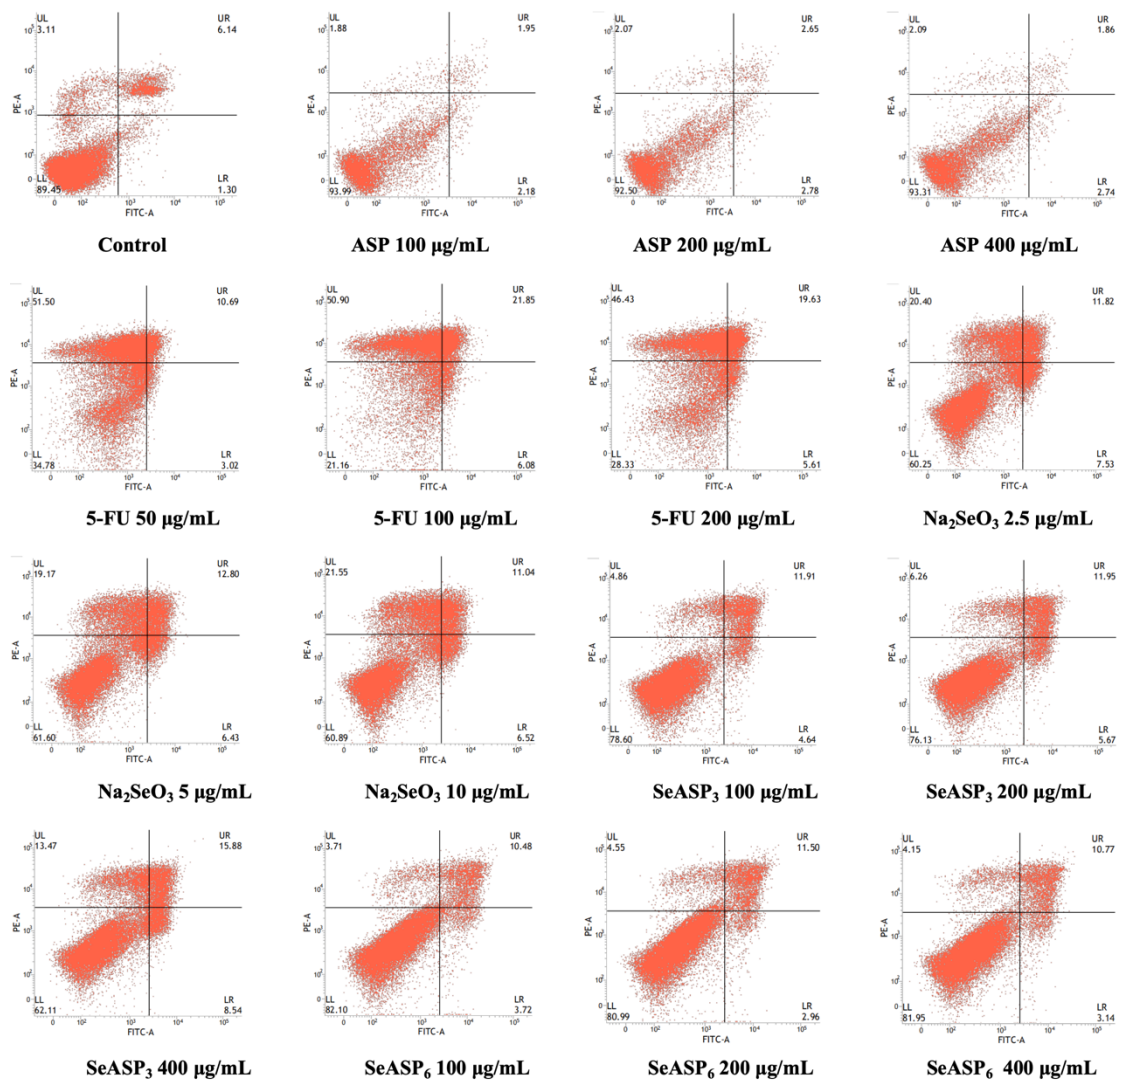

**Fig. S9** Pro-apoptosis effects of Na<sub>2</sub>SeO<sub>3</sub>, 5-FU, ASP, and SeASPs against A549 cells after 48 h treatment.

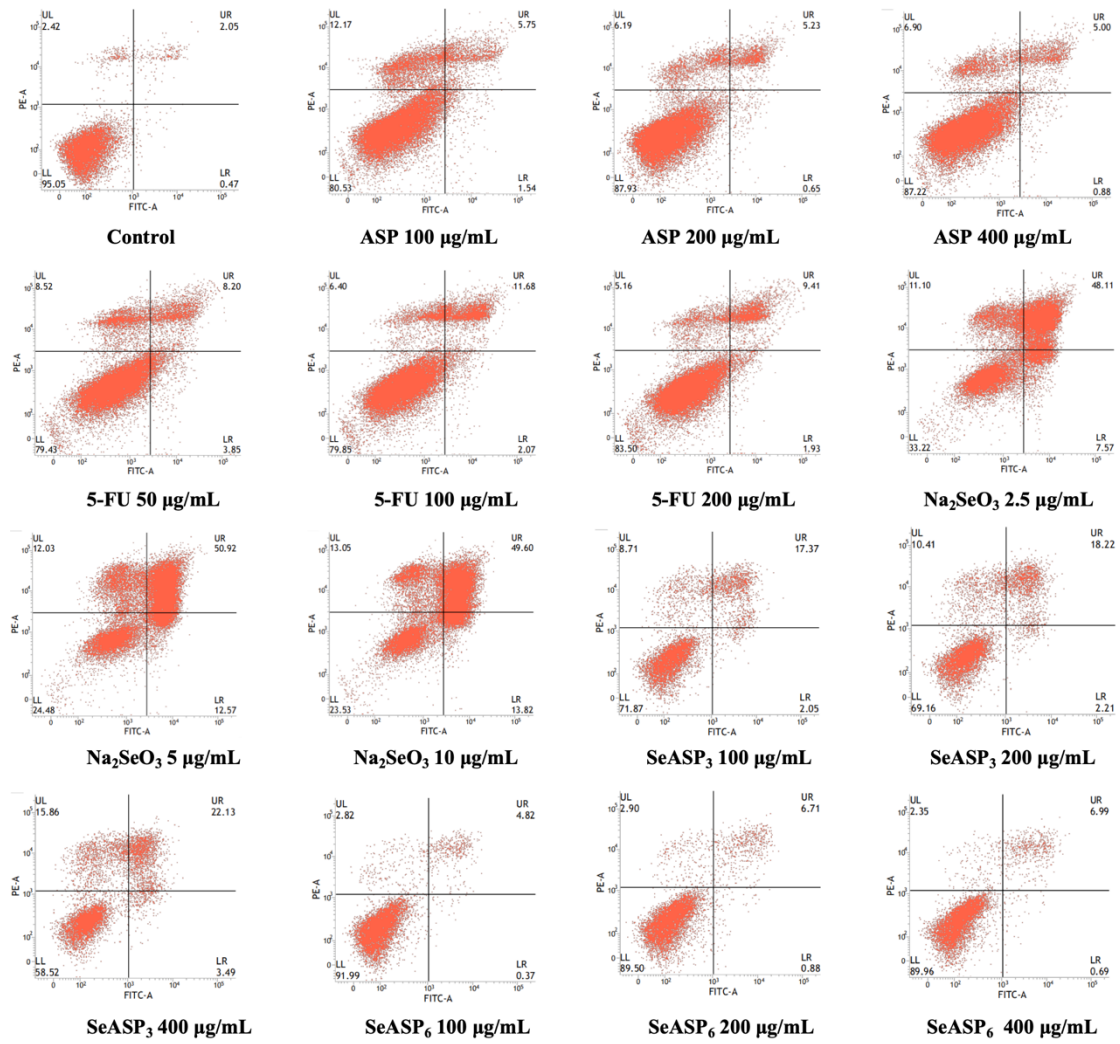

**Fig. S10** Pro-apoptosis effects of Na<sub>2</sub>SeO<sub>3</sub>, 5-FU, ASP, and SeASPs against HepG2 cells after 24 h treatment.

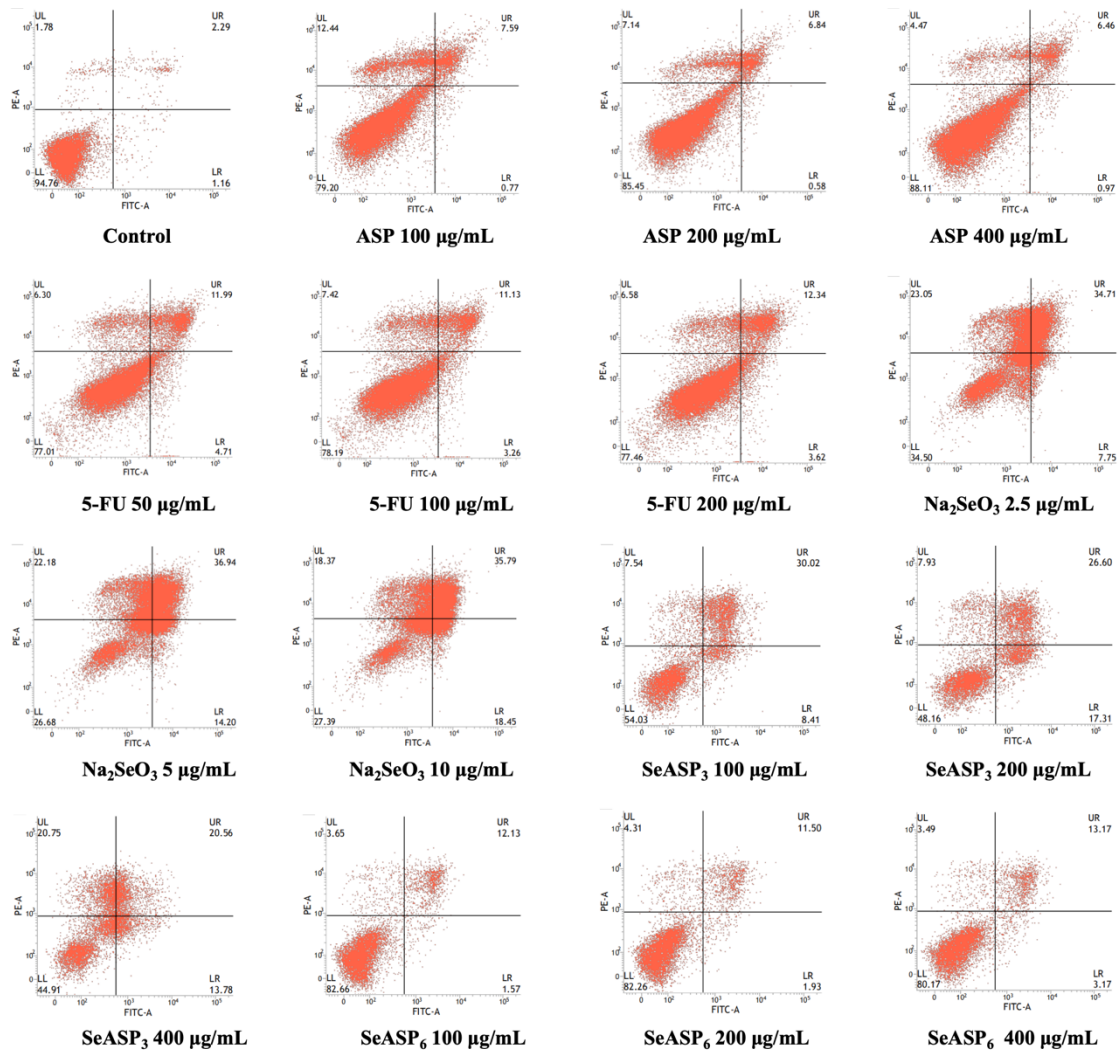

**Fig. S11** Pro-apoptosis effects of Na<sub>2</sub>SeO<sub>3</sub>, 5-FU, ASP, and SeASPs against HepG2 cells after 48 h treatment.



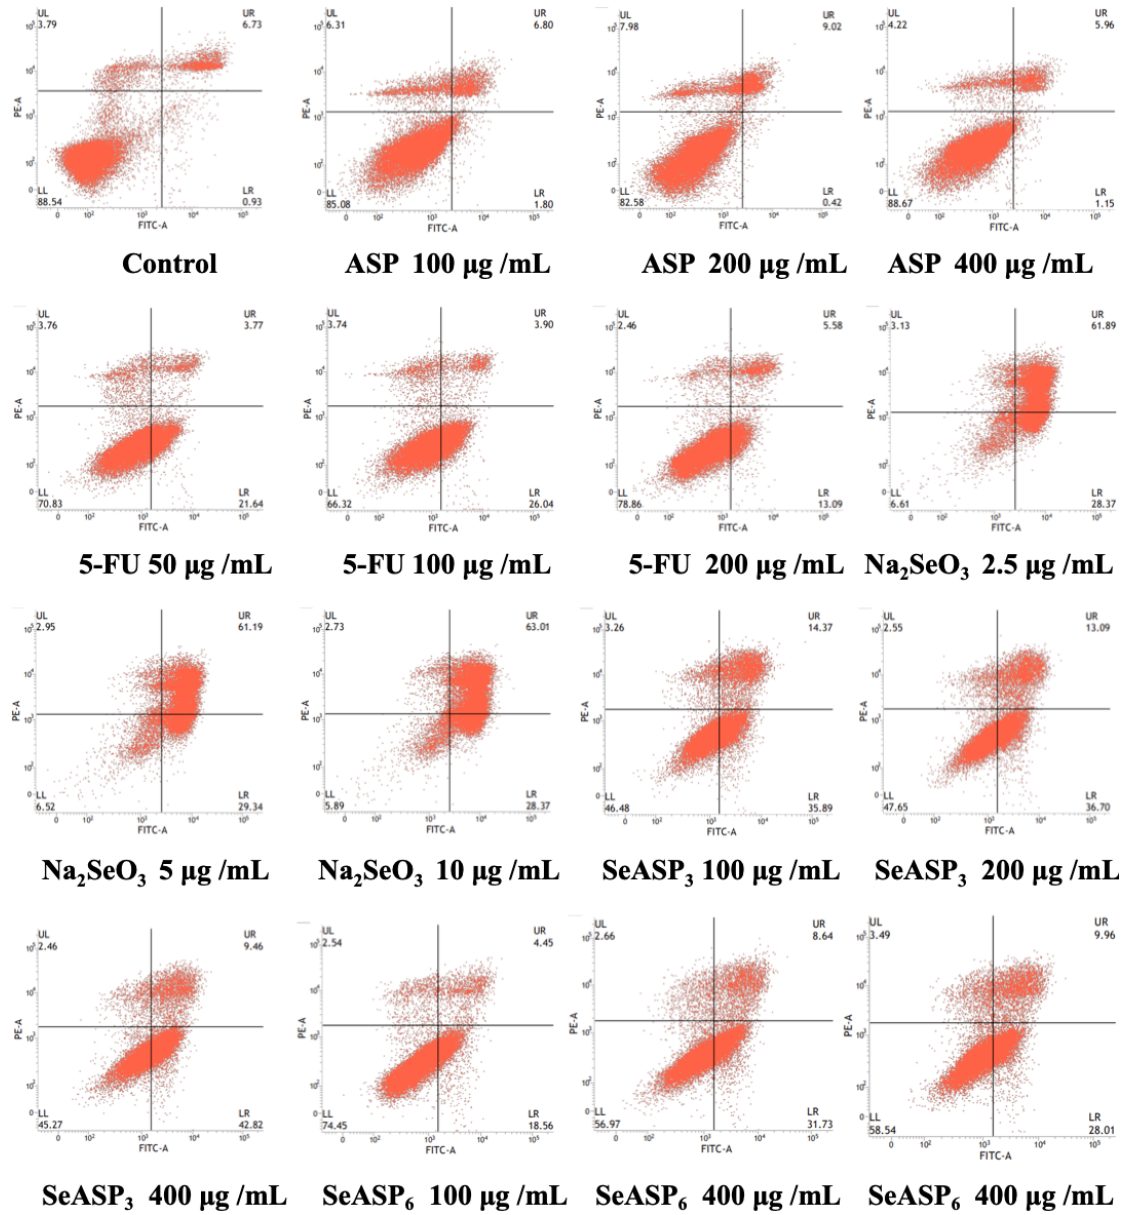

**Fig. S12** Pro-apoptosis effects of Na<sub>2</sub>SeO<sub>3</sub>, 5-FU, ASP, and SeASPs against H1975 cells after 24 h treatment.

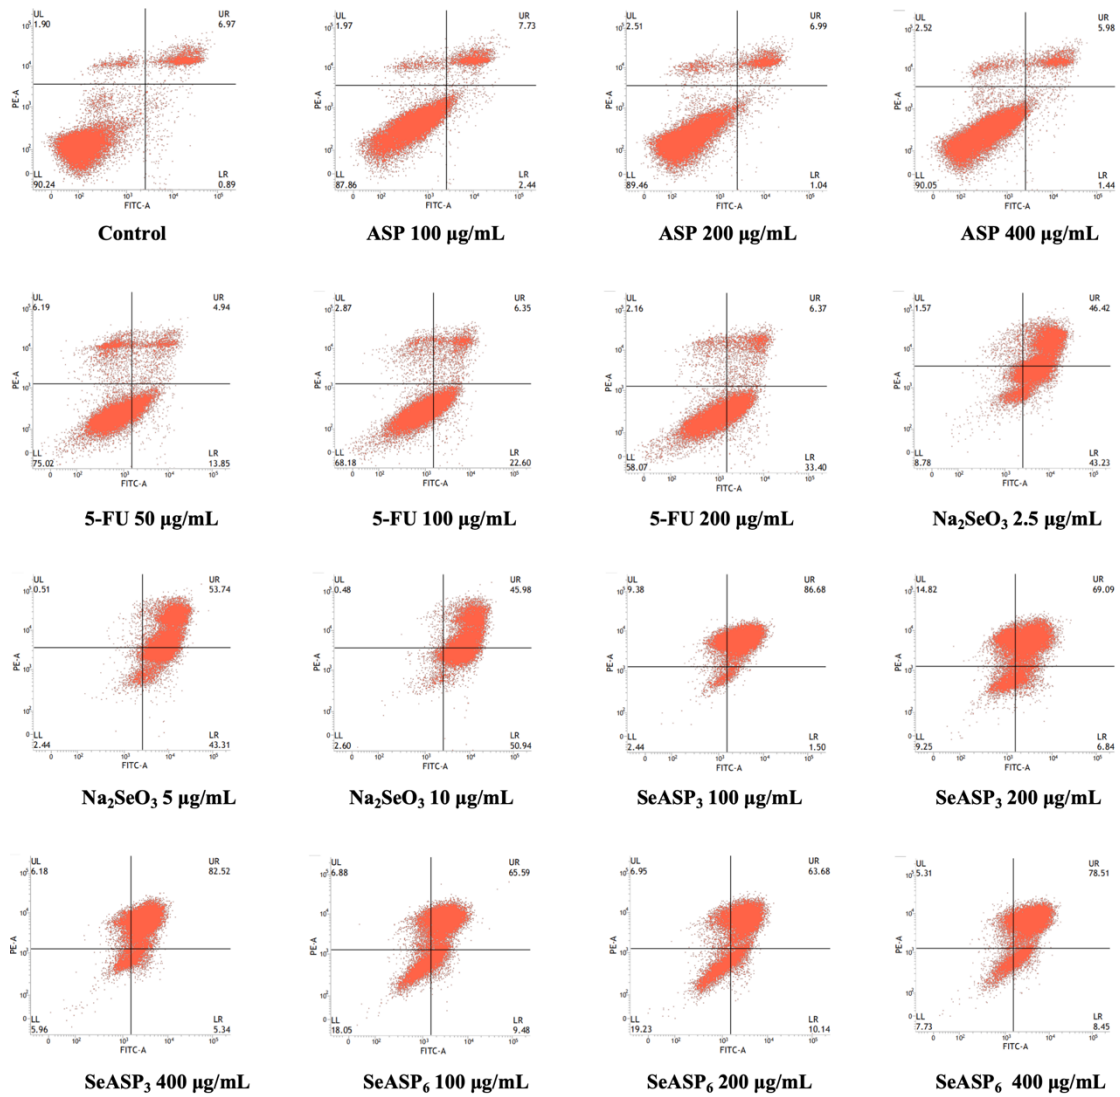

**Fig. S13** Pro-apoptosis effects of Na<sub>2</sub>SeO<sub>3</sub>, 5-FU, ASP, and SeASPs against H1975 cells after 48 h treatment.
